# Supplementary material for: GhWRKY33 Interacts with GhTIFY10A to Synergistically Modulate Both Ageing and JA-Mediated Leaf Senescence in Arabidopsis
Source: MDPI journal article supplement (doi:10.3390/cells11152328), 2022-07-29
Supplement: s1 [file s1]

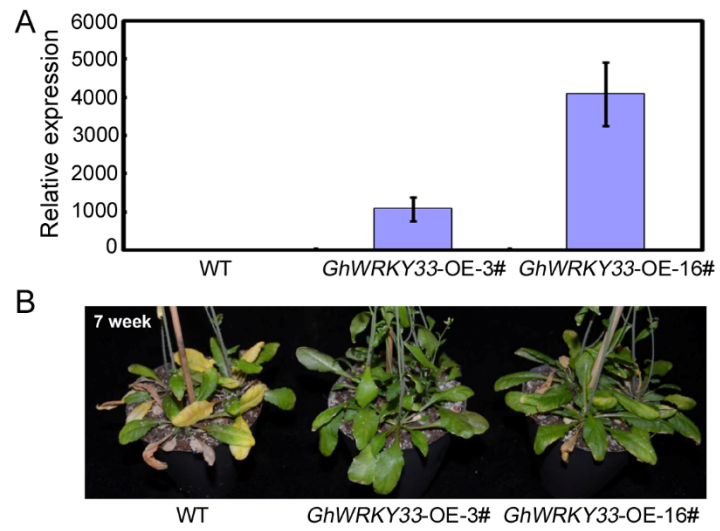

**Figure S1.** *GhWRKY33* delayed leaf senescence in transgenic *Arabidopsis* plants.

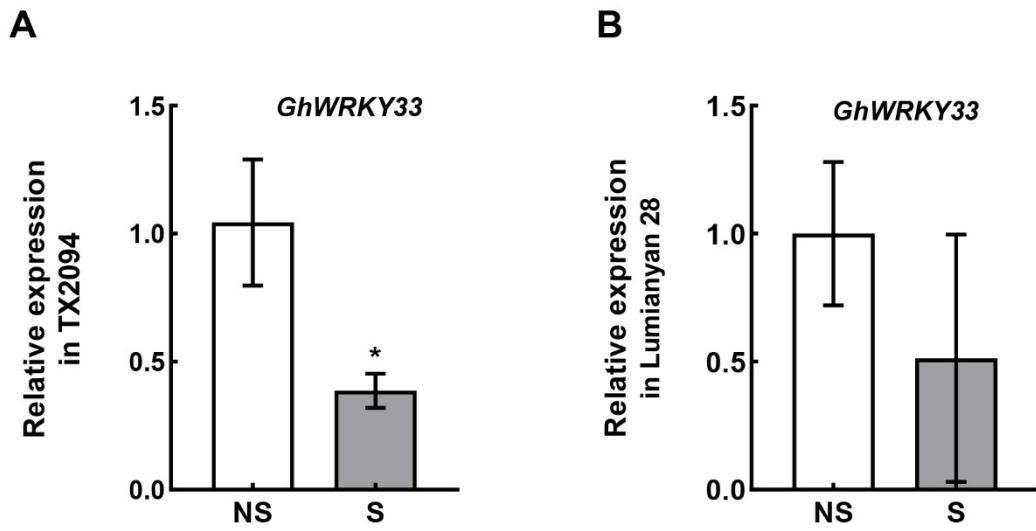

**Figure S2.** The expression level of *GhWRKY33* in leaves of different senescence stages of the cotton variety TX2094 and Lumianyan 28.

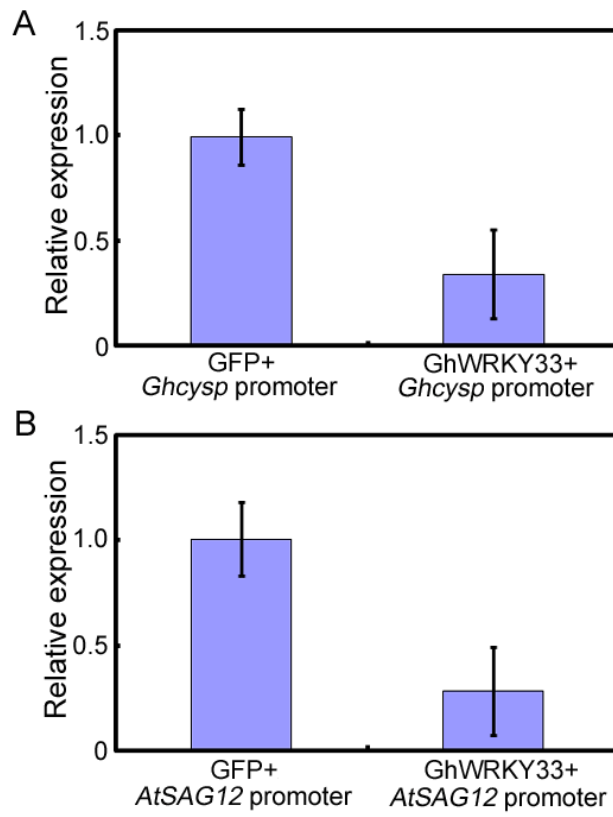

**Figure S3.** GhWRKY33 suppressed the expression of both *AtSAG12* and *Ghcysp*.

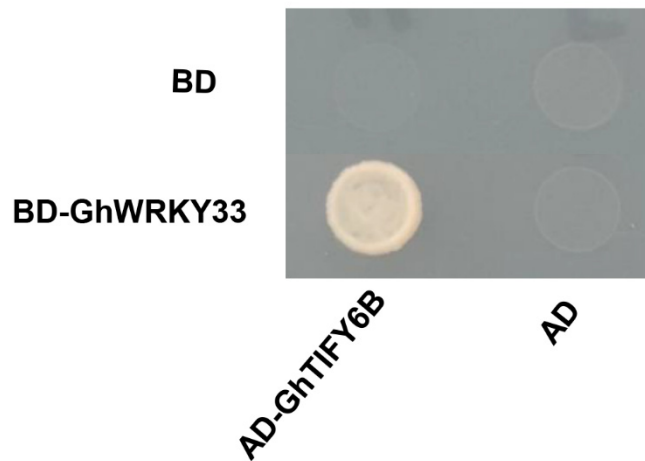

**Figure S4.** GhWRKY33 physically interacts with GhTIFY6B.

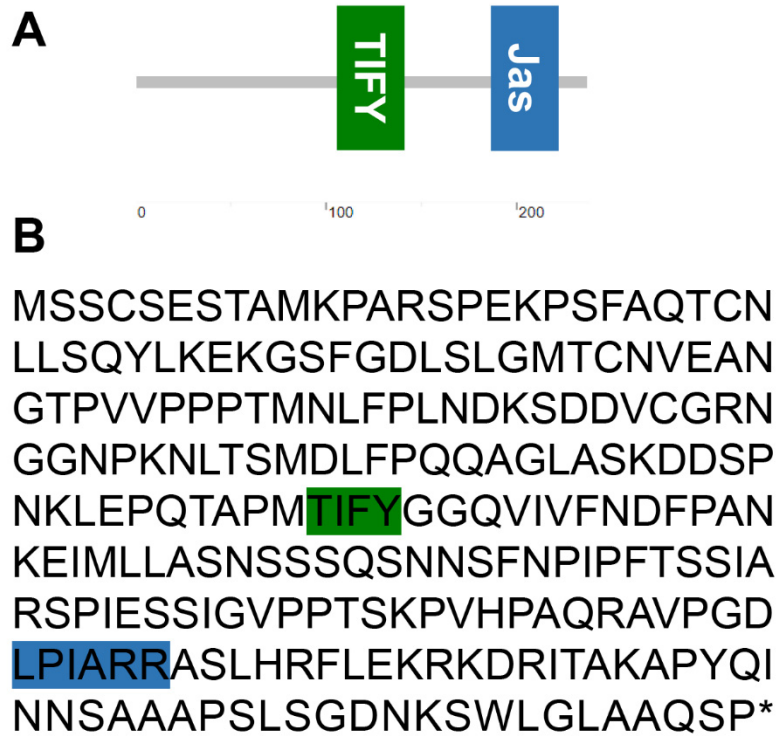

**Figure S5.** Analysis of conservative motif TIFY and Jas in GhTIFY10A.

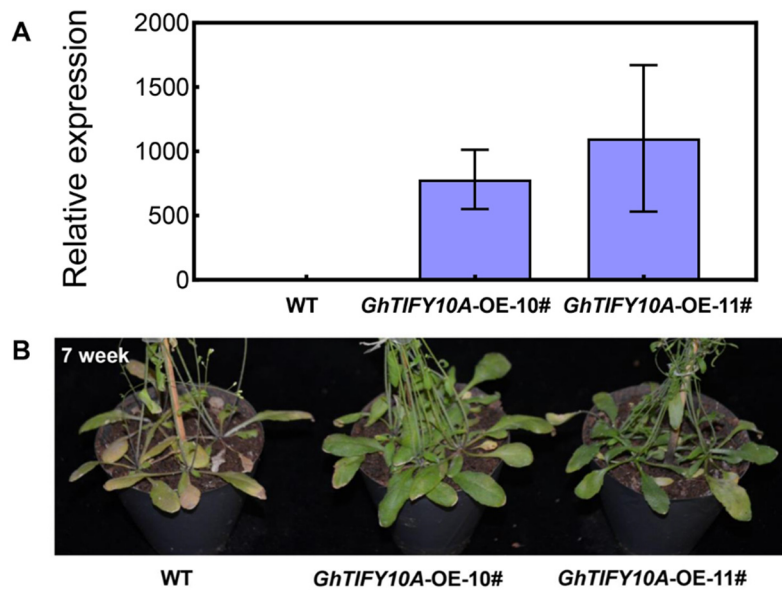

**Figure S6.** *GhTIFY10A* delayed leaf senescence in transgenic *Arabidopsis* plants.

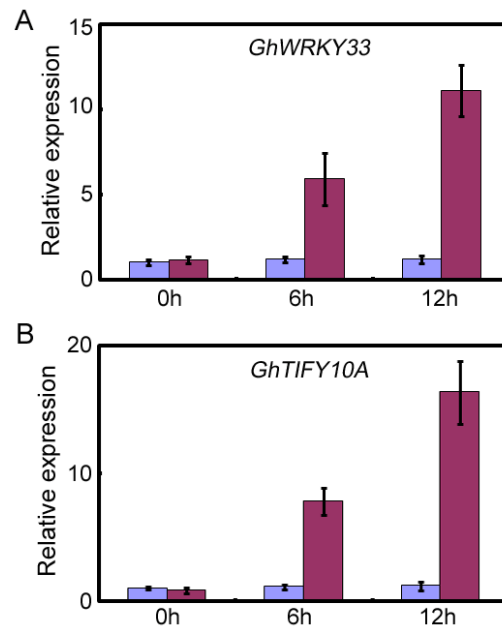

**Figure S7.** Both *GhWRKY33* and *GhTIFY10A* were induced by MeJA treatment.
