# Supplementary material for: GhWRKY33 Interacts with GhTIFY10A to Synergistically Modulate Both Ageing and JA-Mediated Leaf Senescence in Arabidopsis
Source: Cells. 2022 Jul 29;11(15):2328. doi: 10.3390/cells11152328 (PMC9367327; doi:10.3390/cells11152328)
Supplement: Supplementary file 1 [file cells-11-02328-s001.zip › Table S1. Primers used in this study.xlsx]

## Sheet: Sheet1
Table S1. Primers used in this study
RT-qPCR-GhActin-F	ATCCTCCGTCTTGACCTTG
RT-qPCR-GhActin-R	TGTCCGTCAGGCAACTCAT
RT-qPCR-GhWRKY33-F	CTGCCATCTACGACCGCTAC
RT-qPCR-GhWRKY33-R	CCATTTCACCGCAGGTTTTCT
RT-qPCR-TIFY10A-F	CCCCATCCCTTTTACTTCTAGC
RT-qPCR-TIFY10A-R	CTAGGAACCGATGCAGTGAAG
RT-qPCR-AtACTIN2-F	TGTGCCAATCTACGAGGGTTT
RT-qPCR-AtACTIN2-R	TTTCCCGCTCTGCTGTTGT
RT-qPCR-AtSAG12-F	ATCCAAAAGCAACTTCTATTACAGG
RT-qPCR-AtSAG12-R	CCACTGCCTTCATCAGTGC
RT-qPCR-AtSAG13-F	AGGAAAACTCAACATCCTCGTC
RT-qPCR-AtSAG13-R	GCTGACTCGAGATTTGTAGCC
RT-qPCR-AtSAG29-F	GCCACCAGGGAGAAAAGG
RT-qPCR-AtSAG29-R	CCACGAAATGTGTTACCATTAGAA
RT-qPCR-AtSAG113-F	CCATGGCTGTTCCCATGTA
RT-qPCR-AtSAG113-R	AAGCTACGCGCCATTGAC
RT-qPCR-AtSEN4-F	AAGGTGACAAAGAGCAACAATTC
RT-qPCR-AtSEN4-R	CTCTCTAATGGGTGTGTCATCG
RT-qPCR-AtCAB1-F	GCAAGGAACCGTGAACTAGAA
RT-qPCR-AtCAB1-R	TCCGAACTTGACTCCGTTTC
RT-qPCR-AtRBCS1A-F	CGCTCCTTTCAACGGACTTA
RT-qPCR-AtRBCS1A-R	AGTAATGTCGTTGTTAGCCTTGC
GhWRKY33-GAD-F	AAGAATTCATGGCTGCTTCATCATCATCTGCTTT
GhWRKY33-GAD-R	AAGGATCCTCAAGACAGGAATCCGTCCAAAAATG
GhWRKY33-GBK-F	AAGAATTCATGGCTGCTTCATCATCATCTGCTTT
GhWRKY33-GBK-F	AAGGATCCTCAAGACAGGAATCCGTCCAAAAATG
GhTIFY10A-GAD-F	TATGAATTCATGTCGTCTTGCTCGGAATCTA
GhTIFY10A-GAD-R	TATGGATCCTGGTGATTGAGCAGCCAAAC
CLUC-GhWRKY33-F	TATTCTAGAATGGAGAGAGATTTTCTGGGTTTG
CLUC-GhWRKY33-R	TATGTCGACTCATGCATTTGATCCCTGGG
NLUC-GhTIFY10A-F	TATCCCGGGCCATGTCGTCTTGCTCGGAATCTAC
NLUC-GhTIFY10A-R	TATCCCGGGCTTTGGCTGCTCAATCACCATAG
GhWRKY33-62SK-F	TATGGATCCATGGCTGCTTCATCATCATCTG
GhWRKY33-62SK-R	TATCTCGAGTCAAGACAGGAATCCGTCCAA
0800-AtSAG12pro-F	GGGCCCCCCCTCGAGGTCGACAGTTTATCATAGCTTAATTATAGCATTG
0800-AtSAG12pro-R	CGCTCTAGAACTAGTGGATCCTGTTTTAGGAAAGTTAAATGACTTTT
proAtSAG12-F	ATTGTGATTTAATTTGTTGACTAGGGCGATT
proAtSAG12-R	AATCGCCCTAGTCAACAAATTAAATCACAAT
m-proAtSAG12-F	ATTGTGATTTAATTTGTTTTTTAGGGCGATT
m-proAtSAG12-R	AATCGCCCTAAAAAACAAATTAAATCACAAT
proGhcysp-F	ACAATAATTGGTACGTCAATGAAATTTGTAAG
proGhcysp-R	CTTACAAATTTCATTGACGTACCAATTATTGT
m-proGhcysp-F	ACAATAATTGGTACAAAAATGAAATTTGTAAG
m-proGhcysp-R	CTTACAAATTTCATTTTTGTACCAATTATTGT
